# Supplementary material for: Detection and validation of hypoxia-related lncRNAs with associated ceRNA network involved in HCC prognosis, treatment responsiveness
Source: Research Square preprint supplement (doi:10.21203/rs.3.rs-1633183/v1), 2022-05-11
Supplement: Supplementary file 1 [file cce9ac1f169618bdf7392b17.docx]

**Supplementary Table S1** A list of hypoxia-related genes.

PGK1

PDK1

GBE1

PFKL

ALDOA

ENO2

PGM1

NDRG1

HK2

ALDOC

GPI

MXI1

SLC2A1

P4HA1

ADM

P4HA2

ENO1

PFKP

AK4

FAM162A

PFKFB3

VEGFA

BNIP3L

TPI1

ERO1A

KDM3A

CCNG2

LDHA

GYS1

GAPDH

BHLHE40

ANGPTL4

JUN

SERPINE1

LOX

GCK

PPFIA4

MAFF

DDIT4

SLC2A3

IGFBP3

NFIL3

FOS

RBPJ

HK1

CITED2

ISG20

GALK1

WSB1

PYGM

STC1

ZNF292

BTG1

PLIN2

CSRP2

VLDLR

JMJD6

EXT1

F3

PDK3

ANKZF1

UGP2

ALDOB

STC2

ERRFI1

ENO3

PNRC1

HMOX1

PGF

GAPDHS

CHST2

TMEM45A

BCAN

ATF3

CAV1

AMPD3

GPC3

NDST1

IRS2

SAP30

GAA

SDC4

STBD1

IER3

PKLR

IGFBP1

PLAUR

CAVIN3

CCN5

LARGE1

NOCT

S100A4

RRAGD

ZFP36

EGFR

EDN2

IDS

CDKN1A

RORA

DUSP1

MIF

PPP1R3C

DPYSL4

KDELR3

DTNA

ADORA2B

HS3ST1

CAVIN1

NR3C1

KLF6

GPC4

CCN1

TNFAIP3

CA12

HEXA

BGN

PPP1R15A

PGM2

PIM1

PRDX5

NAGK

CDKN1B

BRS3

TKTL1

MT1E

ATP7A

MT2A

SDC3

TIPARP

PKP1

ANXA2

DDIT3

PRKCA

SLC37A4

CXCR4

EFNA3

CP

KLF7

CCN2

CHST3

TPD52

LXN

B4GALNT2

PPARGC1A

BCL2

GCNT2

HAS1

KLHL24

SCARB1

SLC25A1

SDC2

CASP6

VHL

FOXO3

PDGFB

B3GALT6

SLC2A5

SRPX

EFNA1

GLRX

ACKR3

PAM

TGFBI

DCN

SIAH2

PLAC8

FBP1

TPST2

PHKG1

MYH9

CDKN1C

GRHPR

PCK1

INHA

HSPA5

NDST2

NEDD4L

TPBG

XPNPEP1

IL6

SLC6A6

MAP3K1

LDHC

AKAP12

TES

KIF5A

LALBA

COL5A1

GPC1

HDLBP

ILVBL

NCAN

TGM2

ETS1

HOXB9

SELENBP1

FOSL2

SULT2B1

TGFB3

**Supplementary Table S2** A list of 77 hypoxia-related prognostic lncRNAs

| Gene ID | HR | HR.95L | HR.95H | P-value |
| --- | --- | --- | --- | --- |
| SNHG21 | 2.076691 | 1.278225 | 3.373932 | 0.003164 |
| AC010973.2 | 1.747727 | 1.147688 | 2.661481 | 0.00927 |
| AC004816.1 | 1.651425 | 1.268374 | 2.150158 | 0.000195 |
| LINC01018 | 0.886445 | 0.809725 | 0.970434 | 0.00906 |
| AC006504.7 | 1.89975 | 1.362097 | 2.649627 | 0.000157 |
| AL606489.1 | 1.482979 | 1.126179 | 1.952821 | 0.005013 |
| AC016394.2 | 2.093794 | 1.390795 | 3.152134 | 0.0004 |
| BACE1-AS | 1.760876 | 1.282034 | 2.418567 | 0.000475 |
| AP001065.3 | 0.68212 | 0.558945 | 0.832439 | 0.000167 |
| SNHG20 | 1.677499 | 1.167347 | 2.410597 | 0.005167 |
| AL139260.1 | 1.526603 | 1.18599 | 1.965039 | 0.001023 |
| FOXD2-AS1 | 1.513359 | 1.210192 | 1.892474 | 0.000281 |
| LINC01138 | 1.983437 | 1.439753 | 2.73243 | 2.79E-05 |
| NCK1-DT | 2.136835 | 1.345486 | 3.393617 | 0.001294 |
| LINC00665 | 1.295209 | 1.067226 | 1.571893 | 0.008829 |
| TMEM220-AS1 | 0.545202 | 0.413743 | 0.71843 | 1.64E-05 |
| AL117336.2 | 2.348075 | 1.628816 | 3.384946 | 4.78E-06 |
| MAPKAPK5-AS1 | 1.530774 | 1.176731 | 1.991337 | 0.001511 |
| CR936218.2 | 0.65409 | 0.48928 | 0.874415 | 0.004157 |
| AC145207.5 | 2.350272 | 1.555696 | 3.550681 | 4.92E-05 |
| DANCR | 1.306782 | 1.12186 | 1.522185 | 0.000588 |
| PRRT3-AS1 | 1.42871 | 1.188705 | 1.717173 | 0.000143 |
| ZNNT1 | 1.399853 | 1.09624 | 1.787554 | 0.007005 |
| AL050341.2 | 1.509149 | 1.148116 | 1.983712 | 0.003177 |
| AC009005.1 | 1.575442 | 1.279884 | 1.939252 | 1.80E-05 |
| AC007773.1 | 1.382993 | 1.091423 | 1.752456 | 0.007272 |
| AC124798.1 | 1.551411 | 1.239532 | 1.941762 | 0.000125 |
| AC068473.5 | 1.858881 | 1.310558 | 2.636615 | 0.000508 |
| RNF216P1 | 2.030582 | 1.392962 | 2.960068 | 0.00023 |
| AC016747.1 | 1.72246 | 1.224842 | 2.422245 | 0.001773 |
| LINC01273 | 1.642042 | 1.205008 | 2.23758 | 0.001683 |
| AC093227.1 | 1.831729 | 1.222416 | 2.744755 | 0.003355 |
| NRSN2-AS1 | 1.535959 | 1.113081 | 2.119495 | 0.009001 |
| WAC-AS1 | 1.819772 | 1.365823 | 2.424598 | 4.33E-05 |
| AC010969.2 | 1.724901 | 1.163493 | 2.557198 | 0.006653 |
| AC016405.3 | 1.305658 | 1.081977 | 1.575581 | 0.005407 |
| SNHG3 | 1.489624 | 1.24186 | 1.786819 | 1.76E-05 |
| GIHCG | 1.447444 | 1.148849 | 1.823646 | 0.001706 |
| F11-AS1 | 0.66769 | 0.526762 | 0.846321 | 0.00084 |
| AC012467.2 | 1.947368 | 1.238725 | 3.061406 | 0.003884 |
| MIR210HG | 1.52255 | 1.262382 | 1.836338 | 1.10E-05 |
| AC015908.3 | 0.480938 | 0.35805 | 0.646004 | 1.16E-06 |
| CYTOR | 1.353961 | 1.150273 | 1.593718 | 0.000269 |
| AC005332.5 | 1.583293 | 1.191891 | 2.103227 | 0.001516 |
| AL354892.2 | 1.361292 | 1.076554 | 1.72134 | 0.009993 |
| NRAV | 2.063387 | 1.557068 | 2.734347 | 4.59E-07 |
| AC026401.3 | 1.479187 | 1.200293 | 1.822882 | 0.00024 |
| SNHG30 | 1.391224 | 1.099486 | 1.760372 | 0.005963 |
| AL031985.3 | 3.304092 | 2.264267 | 4.821437 | 5.70E-10 |
| AC068987.3 | 1.321286 | 1.076317 | 1.62201 | 0.007747 |
| PXN-AS1 | 1.573031 | 1.125908 | 2.197718 | 0.007931 |
| ZEB1-AS1 | 2.161661 | 1.455471 | 3.210492 | 0.000134 |
| SBF2-AS1 | 1.989938 | 1.350434 | 2.932282 | 0.000504 |
| SNHG1 | 1.383256 | 1.111128 | 1.72203 | 0.003699 |
| LINC02362 | 0.734552 | 0.608553 | 0.886638 | 0.001313 |
| AL049840.6 | 1.435865 | 1.11699 | 1.845774 | 0.004751 |
| MIR4435-2HG | 1.470433 | 1.161021 | 1.862303 | 0.001381 |
| SREBF2-AS1 | 1.947818 | 1.332847 | 2.846535 | 0.000573 |
| AL355574.1 | 1.860116 | 1.384732 | 2.498701 | 3.76E-05 |
| SNHG12 | 1.48851 | 1.133136 | 1.955335 | 0.004263 |
| NIFK-AS1 | 1.72945 | 1.184871 | 2.524323 | 0.004524 |
| LINC00513 | 1.464976 | 1.137037 | 1.887497 | 0.003145 |
| MSC-AS1 | 1.660652 | 1.336566 | 2.063322 | 4.67E-06 |
| AC040970.1 | 1.446911 | 1.150468 | 1.81974 | 0.001587 |
| ZFPM2-AS1 | 1.460701 | 1.260439 | 1.692781 | 4.74E-07 |
| THUMPD3-AS1 | 1.91873 | 1.350854 | 2.725332 | 0.000273 |
| AC010761.1 | 1.778556 | 1.221217 | 2.590251 | 0.002684 |
| AC009779.2 | 1.61373 | 1.19439 | 2.180298 | 0.001827 |
| PIK3CD-AS2 | 1.551109 | 1.242753 | 1.935976 | 0.000104 |
| AC074117.1 | 1.946879 | 1.329324 | 2.851329 | 0.000621 |
| AC087741.2 | 1.407286 | 1.113881 | 1.777976 | 0.004183 |
| PTOV1-AS1 | 1.744637 | 1.18703 | 2.56418 | 0.004617 |
| AC115619.1 | 0.80501 | 0.714363 | 0.907159 | 0.000373 |
| LINC00205 | 1.571736 | 1.204473 | 2.050983 | 0.000868 |
| MAFG-DT | 1.402912 | 1.177924 | 1.670874 | 0.000147 |
| AC073611.1 | 1.956944 | 1.366894 | 2.801701 | 0.000245 |
| ZNF529-AS1 | 1.703559 | 1.166095 | 2.488746 | 0.005878 |

**Supplementary Table S3** Comparison of overall survival rate between the high risk and low risk groups in the entire TCGA database.

| Factors | Log‑rank P |
| --- | --- |
| Age |  |
| <=65 | P<0.001 |
| >65 | 0.011 |
| Gender |  |
| Male | P<0.001 |
| Female | 0.032 |
| Grade |  |
| Low grade | P<0.001 |
| High grade | P=0.001 |
| Stage |  |
| Stage I-II | P<0.001 |
| Stage III-IV | P<0.001 |

**Supplementary Table S4** Gene set enrichment analysis (GSEA).

| NAME | TCGA | | | | |
| --- | --- | --- | --- | --- | --- |
| SIZE | ES | NES | NOM p-val | FDR q-val |
| KEGG_MTOR_SIGNALING_PATHWAY | 52 | 0.561847 | 1.728163 | 0.011881 | 0.052501 |
| KEGG_P53_SIGNALING_PATHWAY | 68 | 0.516774 | 1.682414 | 0.008 | 0.064223 |
| KEGG_VEGF_SIGNALING_PATHWAY | 76 | 0.469858 | 1.556492 | 0.030488 | 0.110411 |
| KEGG_NOD_LIKE_RECEPTOR_SIGNALING_PATHWAY | 62 | 0.61531 | 1.822642 | 0.003953 | 0.048522 |
| KEGG_PATHWAYS_IN_CANCER | 325 | 0.49 | 1.69 | 0.004 | 0.065 |
| KEGG_PPAR_SIGNALING_PATHWAY | 69 | -0.562138 | -1.776936 | 0.010246 | 0.022212 |
| KEGG_FATTY_ACID_METABOLISM | 42 | -0.835784 | -2.01735 | 0.0 | 0.001023 |
| KEGG_DRUG_METABOLISM_CYTOCHROME_P450 | 71 | -0.68627 | -2.044149 | 0.0 | <0.001 |
| KEGG_COMPLEMENT_AND_COAGULATION_CASCADES | 69 | -0.796814 | -2.265792 | 0.0 | 0.0 |
| KEGG_GLYCINE_SERINE_AND_THREONINE_METABOLISM  COLDREN_GEFITINIB_RESISTANCE_UP  HONMA_DOCETAXEL_RESISTANCE  TOOKER_GEMCITABINE_RESISTANCE_DN | 31  86  35  123 | -0.808965  0.61  0.62  0.55 | -2.110269  1.96  1.69  1.8 | 0.0  0.0  0.025  0.0 | <0.001  0.007  0.025  0.0 |

**Supplementary Table S5** The correlation coefficient of lncRNA-microRNA in TCGA.

| LncRNA | MicroRNA | Correlation coefficient |
| --- | --- | --- |
| THUMPD3-AS1 | hsa-miR-497-5p | -0.30 |
| THUMPD3-AS1 | hsa-miR-424-5p | -0.22 |
| THUMPD3-AS1 | hsa-miR-29c-3p | -0.28 |
| THUMPD3-AS1 | hsa-miR-29a-3p | -0.25 |
| THUMPD3-AS1 | hsa-miR-195-5p | -0.27 |
| THUMPD3-AS1 | hsa-miR-144-3p | -0.15 |
| AC074117.1 | hsa-miR-139-5p | -0.29 |
| SNHG3 | hsa-miR-139-5p | -0.36 |
| THUMPD3-AS1 | hsa-miR-139-5p | -0.38 |
| AC074117.1 | hsa-miR-125b-5p | -0.19 |

**Supplementary Table S6** The correlation coefficient of microRNA-mRNA in TCGA.

| MicroRNA | mRNA | Correlation coefficient |
| --- | --- | --- |
| hsa-miR-125b-5p | MAP3K1 | -0.211049631 |
| hsa-miR-125b-5p | SCARB1 | -0.201005751 |
| hsa-miR-125b-5p | TNFAIP3 | -0.188104313 |
| hsa-miR-125b-5p | DPYSL4 | -0.131533048 |
| hsa-miR-139-5p | TPD52 | -0.356325166 |
| hsa-miR-139-5p | ATP7A | -0.24570786 |
| hsa-miR-139-5p | PRKCA | -0.155761254 |
| hsa-miR-139-5p | DDIT4 | -0.146018192 |
| hsa-miR-144-3p | CCNG2 | -0.109624236 |
| hsa-miR-144-3p | KDM3A | -0.106096522 |
| hsa-miR-195-5p | KIF5A | -0.13678801 |
| hsa-miR-195-5p | RBPJ | -0.114331749 |
| hsa-miR-29a-3p | VHL | -0.322704245 |
| hsa-miR-29a-3p | FOXO3 | -0.233179975 |
| hsa-miR-29a-3p | XPNPEP1 | -0.220979351 |
| hsa-miR-29a-3p | KIF5A | -0.215931968 |
| hsa-miR-29a-3p | NDST1 | -0.212408187 |
| hsa-miR-29a-3p | VEGFA | -0.128402148 |
| hsa-miR-29a-3p | LOX | -0.120438872 |
| hsa-miR-29c-3p | VHL | -0.352336712 |
| hsa-miR-29c-3p | XPNPEP1 | -0.250577386 |
| hsa-miR-29c-3p | FOXO3 | -0.245048199 |
| hsa-miR-29c-3p | NDST1 | -0.238453755 |
| hsa-miR-29c-3p | KIF5A | -0.216689899 |
| hsa-miR-29c-3p | VEGFA | -0.21323164 |
| hsa-miR-29c-3p | COL5A1 | -0.158865569 |
| hsa-miR-29c-3p | LOX | -0.135226909 |
| hsa-miR-424-5p | HEXA | -0.124679874 |
| hsa-miR-497-5p | KIF5A | -0.214198428 |
| hsa-miR-497-5p | VEGFA | -0.168245367 |
| hsa-miR-497-5p | RBPJ | -0.133332472 |
| hsa-miR-497-5p | ATP7A | -0.120864818 |
| hsa-miR-497-5p | HOXB9 | -0.10990125 |

**Supplementary Table S7** Binding site between miRNA and mRNA

| Name | Site |
| --- | --- |
| Position 1085-1092 of TPD52 3' UTR | 5' ...AAACUGUAAAAUGAUACUGUAGA... |
|  | ||||||| |
| [hsa-miR-139-5p](http://www.mirbase.org/cgi-bin/mirna_entry.pl?acc=hsa-miR-139-5p" \o "http://www.mirbase.org/cgi-bin/mirna_entry.pl?acc=hsa-miR-139-5p) | 3' UGACCUCUGUGCACGUGACAUCU |
|  |  |
| Position 3159-3166 of ATP7A 3' UTR | 5' ...AAUGCUUAAAAUAGCACUGUAGA... |
|  | ||||||||| |
| [hsa-miR-139-5p](http://www.mirbase.org/cgi-bin/mirna_entry.pl?acc=hsa-miR-139-5p" \o "http://www.mirbase.org/cgi-bin/mirna_entry.pl?acc=hsa-miR-139-5p) | 3' UGACCUCUGUGCACGUGACAUCU |
|  |  |
| Position 1151-1157 of PRKCA 3' UTR | 5' ...AUGACAGGCCUGGAGCUGUAGAA... |
|  | |||| |||||| |
| [hsa-miR-139-5p](http://www.mirbase.org/cgi-bin/mirna_entry.pl?acc=hsa-miR-139-5p" \o "http://www.mirbase.org/cgi-bin/mirna_entry.pl?acc=hsa-miR-139-5p) | 3' UGACCUCUGUGCACGU---GACAUCU |
|  |  |
| Position 210-216 of DDIT4 3' UTR | 5' ...CACAUACCCCUCAGUACUGUAGC... |
|  | ||||||| |
| [hsa-miR-139-5p](http://www.mirbase.org/cgi-bin/mirna_entry.pl?acc=hsa-miR-139-5p" \o "http://www.mirbase.org/cgi-bin/mirna_entry.pl?acc=hsa-miR-139-5p) | 3' UGACCUCUGUGCACGUGACAUCU |

**Supplementary Table S8** Binding site between miRNA and lncRNA

| Name | Site |
| --- | --- |
| miR-139-5p | chr2:27579289-27579294 |
| AC074117.1 | TGTAGG |
| miR-139-5p | chr2:27582715-27582720 |
| AC074117.1 | TGTAGA |
| hsa-miR-139-5p | chr1:28836722-28836727 |
| SNHG3 | TGTAGA |
| hsa-miR-139-5p | chr3:9430806-9430811 |
| THUMPD3-AS1 | CTACAG |
| hsa-miR-139-5p | chr3:9431831-9431836 |
| THUMPD3-AS1 | CTACAG |
